# Supplementary material for: Host Modulators of H1N1 Cytopathogenicity
Source: PubMed Central journal article supplement (PMC3410888; doi:10.1371/journal.pone.0039284), 2012-08-02
Supplement: pone.0039284.s001.pdf [file pone.0039284.s001.pdf]

Figure S1

### Resistors

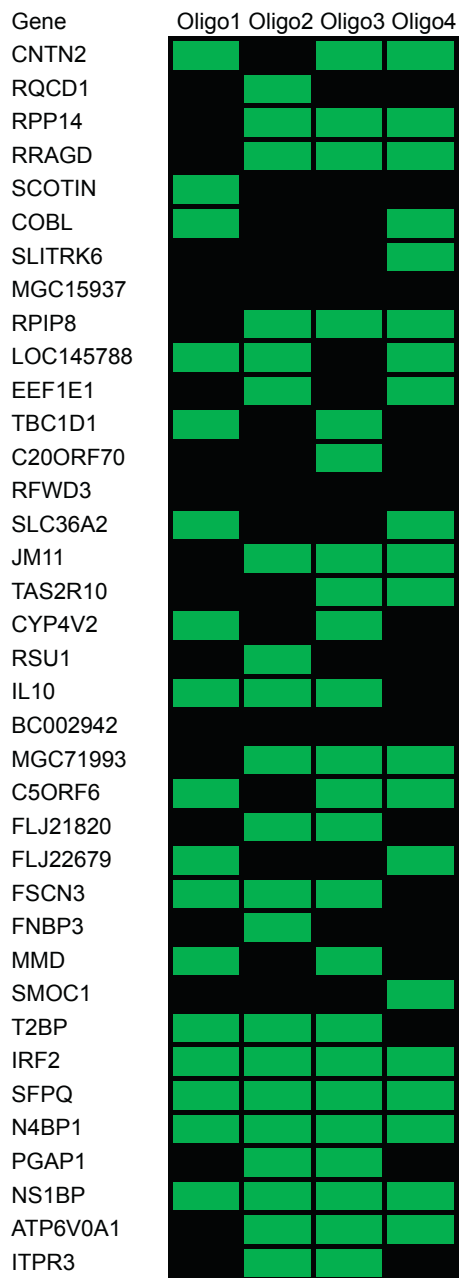

■ p < 0.05

### Sensitizers

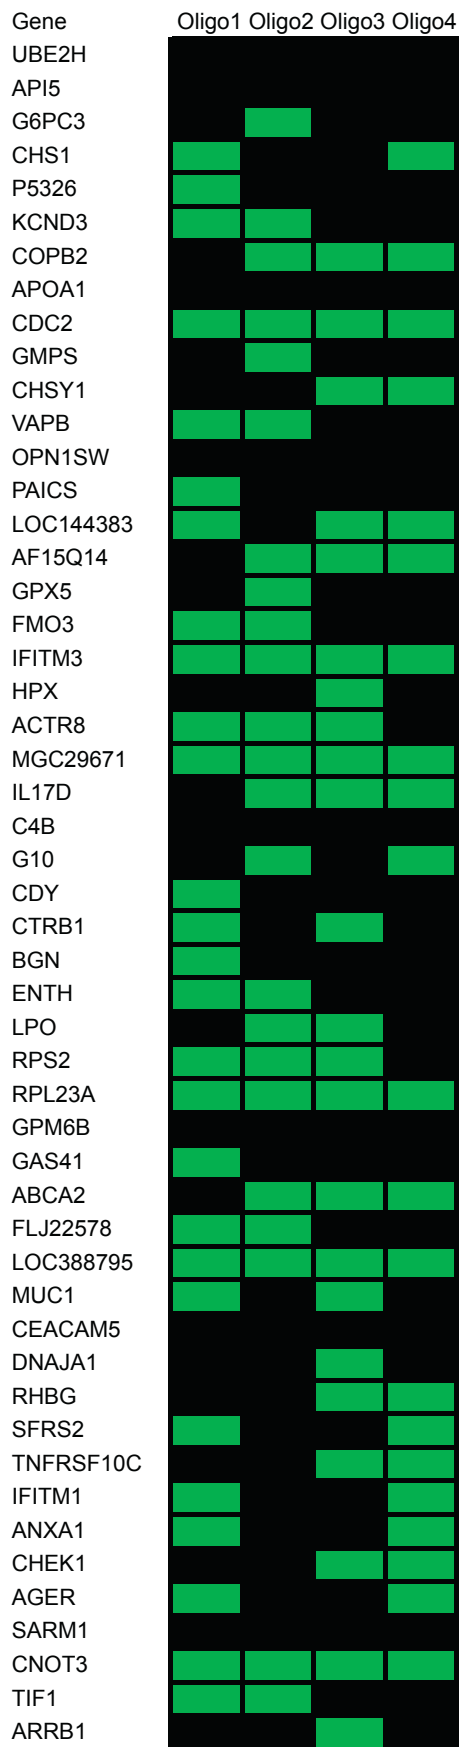

■ p < 0.05
