# Supplementary material for: Host Modulators of H1N1 Cytopathogenicity
Source: PubMed Central journal article supplement (PMC3410888; doi:10.1371/journal.pone.0039284), 2012-08-02

Figure S2

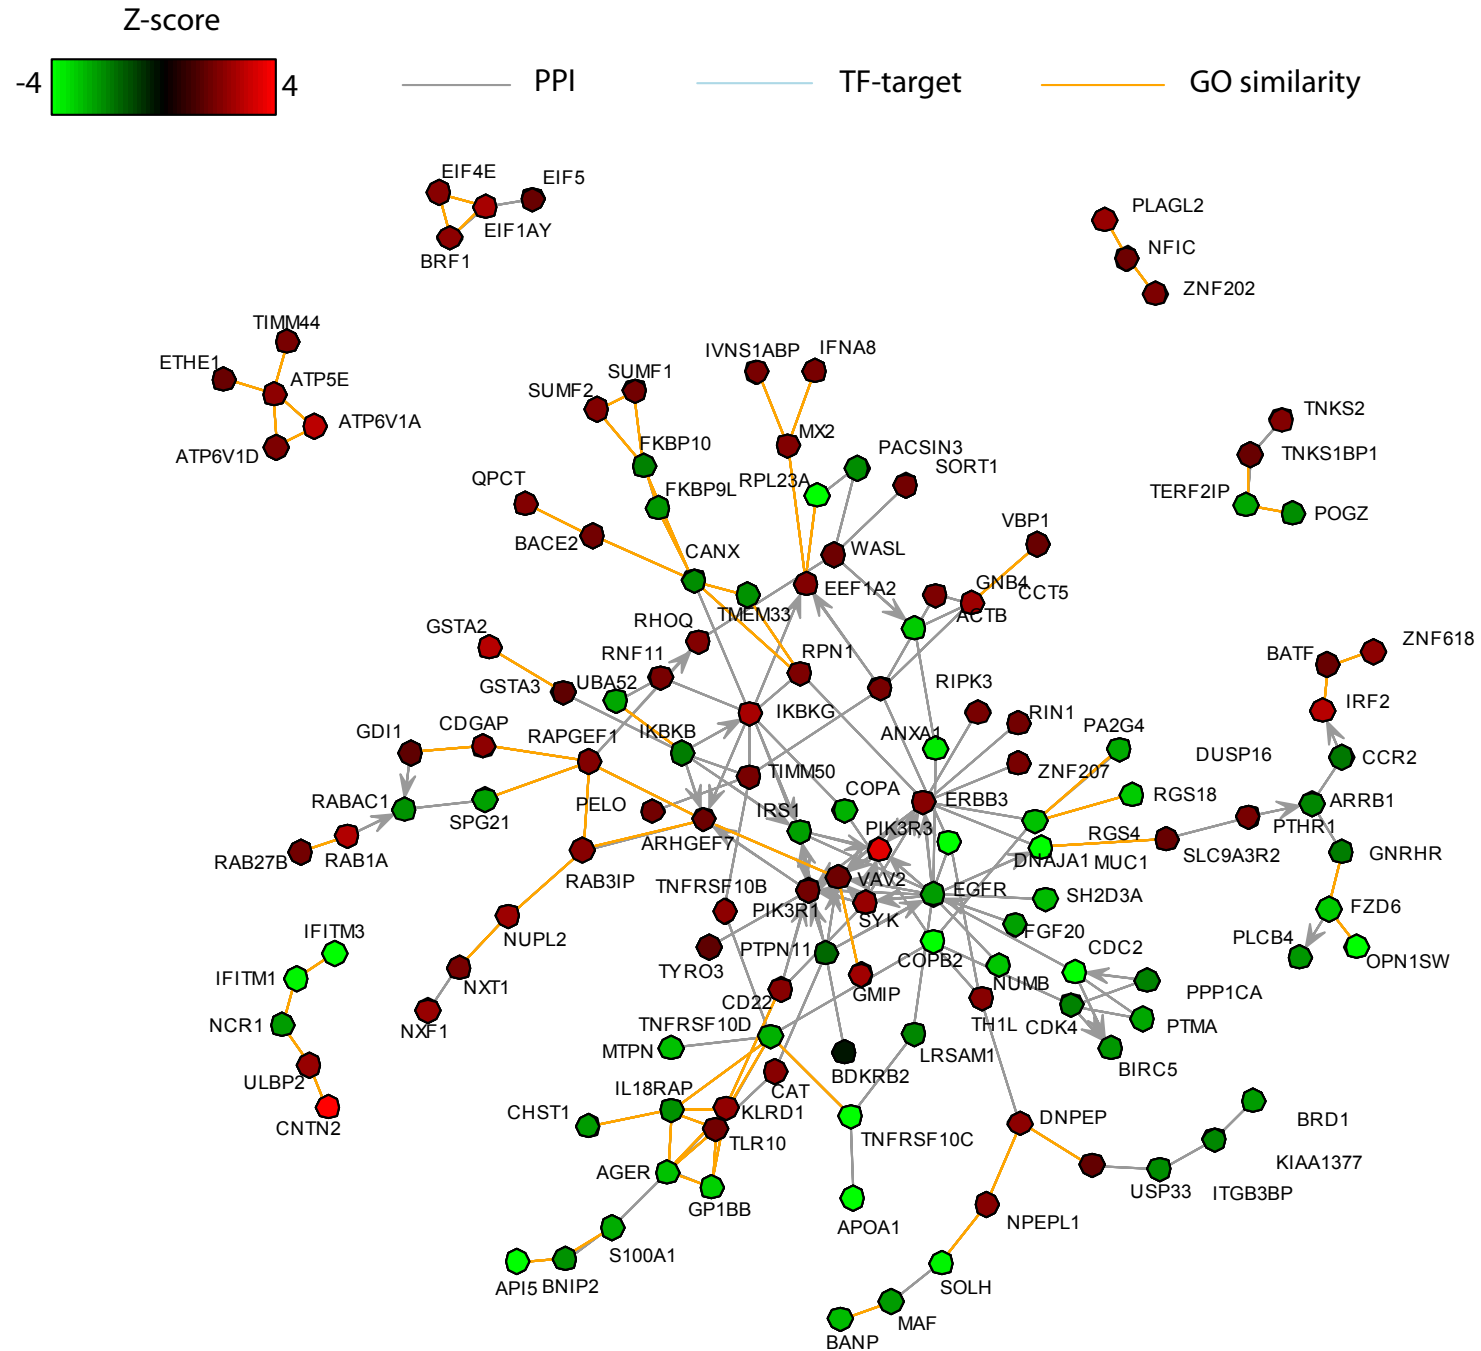

Supplement: pone.0039284.s002.pdf [file pone.0039284.s002.pdf]
